# Supplementary material for: High Rate of Circulating MERS-CoV in Dromedary Camels at Slaughterhouses in Riyadh, 2019
Source: PubMed Central journal article supplement (PMC7692456; doi:10.3390/v12111215), 2020-10-27
Supplement: viruses-12-01215-s001.pdf [file viruses-12-01215-s001.pdf]

Supplementary file

**Table 1.** Primers used for amplification of the MERS-CoV spike gene.

| No. | Primer Name | Primer Sequence         |
|-----|-------------|-------------------------|
| 1   | Seq-spk-F1  | CTCTTGGTGGGTCTGTTGCTA   |
| 2   | Seq-spk-R1  | TTTGTGGAGTTGTGCCTGT     |
| 3   | Seq-spk-F2  | TTCCCTATCAGGGAGACCA     |
| 4   | Seq-spk-R2  | ATACGTAGAAGGCAGCCCAA    |
| 5   | Seq-spk-F3  | TTGTACGGCGGCAATATGT     |
| 6   | Seq-spk-R3  | AATCACCGTCTTCCCACACA    |
| 7   | Seq-spk-F4  | TGCTCTCGTCTTCTTTCTGATG  |
| 8   | Seq-spk-R4  | ACTTGCAGTCCTCTACGAACA   |
| 9   | Seq-spk-F5  | CGGCGAGATTCTACATATGGC   |
| 10  | Seq-spk-R5  | CTGATGCTGGACCTTGCTG     |
| 11  | Seq-spk-F6  | GGCAGTCGTAGTGCACGTAGT   |
| 12  | Seq-spk-R6  | CTGCTGTGCAACAAAAGCAT    |
| 13  | Seq-spk-F7  | CGCCTCTATTGGAGACATCA    |
| 14  | Seq-spk-R7  | GTACCACGGCCATTTGTTGT    |
| 15  | Seq-spk-F8  | CCTACGAGATGTTGTCTCTTCAA |
| 16  | Seq-spk-R8  | TCTGCAGATGGGACGTCAAT    |
